# Supplementary material
Source: publisher figshare collection journal article supplement (https://acs.figshare.com/ndownloader/files/3779497)
Supplement: Supplementary file 1 [file 3779497]

# Supporting Information

## **Electrocatalytic Hydrogen Evolution from Molybdenum Sulfide– Polymer Composite Films on Carbon Electrodes**

*Youssef Lattach, Alain Deronzier, and Jean-Claude Moutet\**

*Université Joseph Fourier Grenoble1, Département de Chimie Moléculaire, UMR CNRS-5250, Institut de Chimie Moléculaire de Grenoble, FR CNRS-2607, BP 53, 38041, Grenoble Cedex 9, France*

---

\*To whom correspondence should be addressed.

E-mail: Jean-Claude.Moutet@ujf-grenoble.fr (J.-C. Moutet);

**Deposition of a  $\text{MoS}_x$  film onto a naked carbon electrode and polarization curve for the resulting  $\text{C}|\text{MoS}_x$  film modified electrode in acidic aqueous electrolyte**

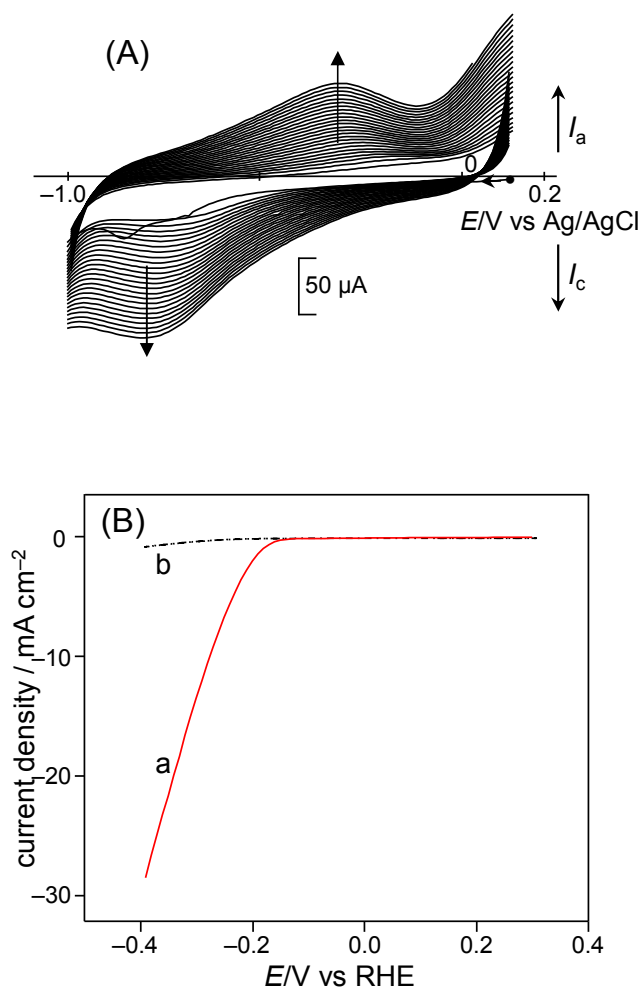

**Figure S1.** (A) Deposition of a  $\text{MoS}_x$  film on a glassy carbon disc electrode (3 mm diameter) by repeated cyclic voltammetry scans (25 cycles) in a 10 mM aqueous solution of  $(\text{NH}_4)_2\text{MoS}_4$  containing 0.1 M  $\text{NaClO}_4$ , pH 6.6; scan rate  $50 \text{ mV s}^{-1}$ . (B) Curve a: polarization curve recorded with the  $\text{C}|\text{MoS}_x$  film modified electrode prepared in (A), in 0.5 M aqueous  $\text{H}_2\text{SO}_4$  (pH 0.3); curve b: curve recorded at a naked carbon disc electrode; scan rate  $20 \text{ mV s}^{-1}$ .

Redox features for  $\text{MoS}_4^{2-}$  in acetonitrile electrolyte

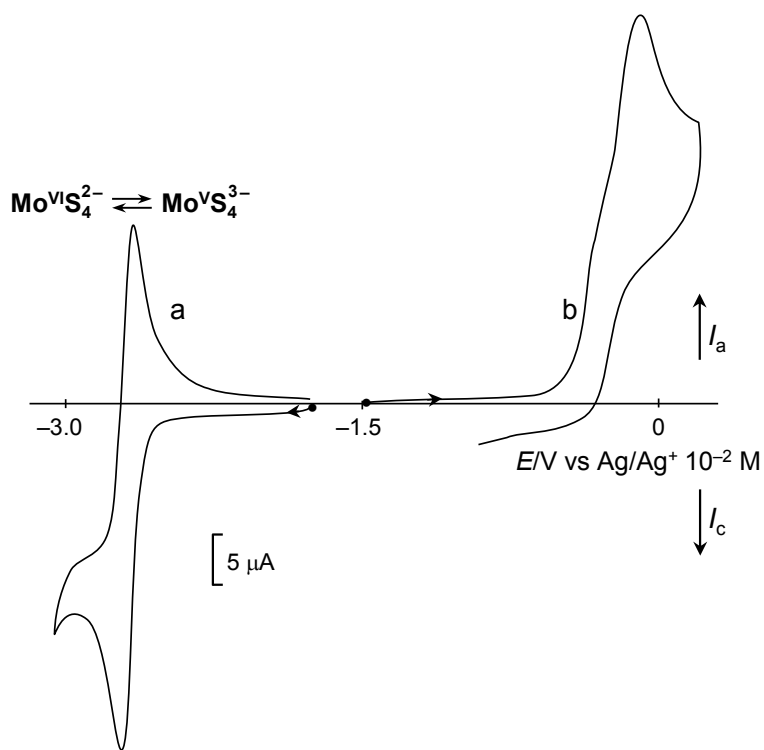

**Figure S2.** CV curve obtained at a 3 mm diameter carbon disc electrode in  $\text{CH}_3\text{CN}$  containing 2.7 mM  $(\text{Et}_4\text{N})_2\text{MoS}_4$  and 0.1 M TBAP; scan rate  $50 \text{ mV s}^{-1}$

**Electroreductive deposition of  $\text{MoS}_x$  into a poly1 film, following the incorporation  $\text{MoS}_4^{2-}$  from an aqueous solution, and polarization curve recorded with the resulting C|poly1- $\text{MoS}_x$  modified electrode in acidic aqueous electrolyte**

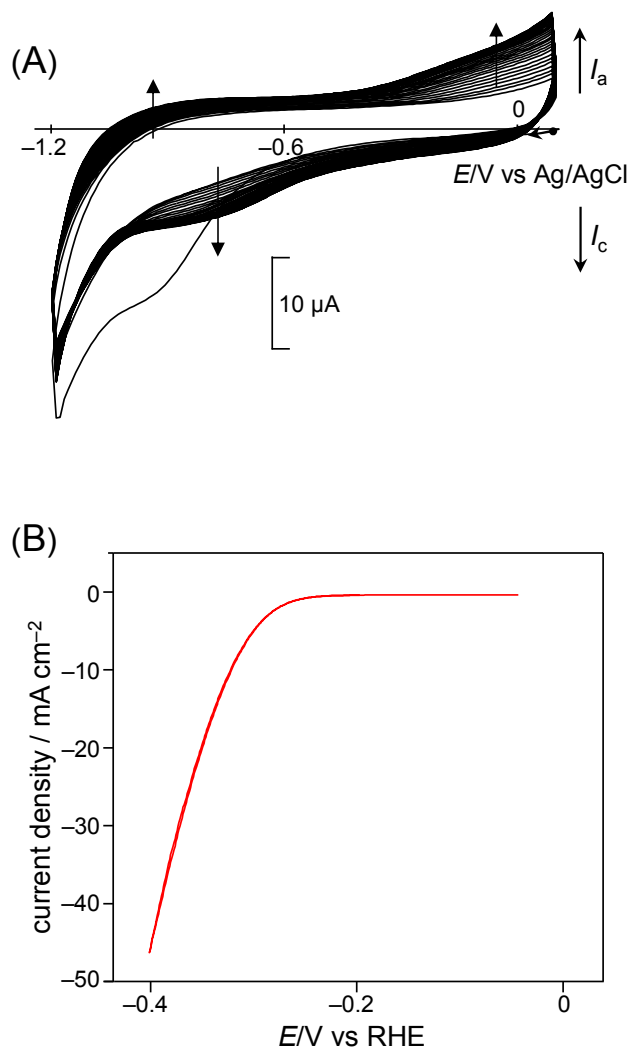

**Figure S3.** (A) Electroreductive precipitation of  $\text{MoS}_x$  into a poly(pyrrole-alkylammmonium) film, by repeated cyclic voltammetry scans in a 0.1 M  $\text{NaClO}_4$  aqueous solution (pH 6) at a C|poly1 modified electrode (3 mm diameter;  $\Gamma_{\text{N}^+} = 8 \times 10^{-8} \text{ mol cm}^{-2}$ ) previously soaked for 10 min in a 10 mM aqueous solution of  $(\text{NH}_4)_2\text{MoS}_4$ ; scan rate  $50 \text{ mV s}^{-1}$ . (B) Polarization curve recorded in 0.5 M  $\text{H}_2\text{SO}_4$  (pH 0.3) with the C|poly1- $\text{MoS}_x$  modified electrode prepared in A; scan rate  $20 \text{ mV s}^{-1}$ .

**Deposition of MoS<sub>x</sub> into a poly1 film under various electrochemical conditions, and polarization curves recorded with the resulting C|poly1-MoS<sub>x</sub> modified electrodes in acidic aqueous electrolyte**

Carbon electrodes modified with poly1 films have been soaked for 10 min in an (NH<sub>4</sub>)<sub>2</sub>MoS<sub>4</sub> aqueous solution, then were treated under different electrochemical conditions, including potential cycling in the negative potential region, anodic electrolysis at 0.1 V, and cathodic electrolysis at −1.0 V. The catalytic activity towards proton reduction of the C|poly1-MoS<sub>x</sub> modified electrodes synthesized by these different conditions was then evaluated from the polarization curves recorded in acidic electrolyte (Figure S4).

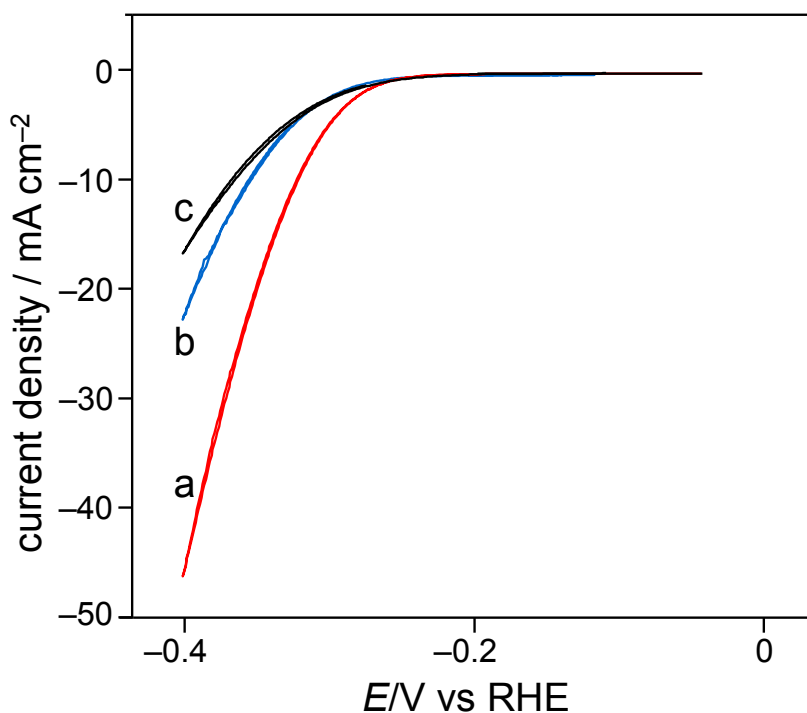

**Figure S4.** Polarization curves recorded in aqueous H<sub>2</sub>SO<sub>4</sub> (pH 0.3) at C|poly1-MoS<sub>x</sub> modified electrodes prepared under various conditions; scan rate 20 mV s<sup>-1</sup>; the electrodes (3 mm diameter;  $\Gamma_{\text{N}^+} = 8 \times 10^{-8}$  mol cm<sup>-2</sup>) were previously soaked for 10 min in a 10 mM aqueous solution of (NH<sub>4</sub>)<sub>2</sub>MoS<sub>4</sub>, then transferred to aqueous 0.1 M NaClO<sub>4</sub> (pH 6) and treated under different electrochemical conditions; electrode (a): repeated scans (25 cycles; scan rate 20 mV s<sup>-1</sup>) over the 0.1 V to −1.2 V potential range; electrode (b): reduction at constant applied potential (−1.0 V) for 10 min; electrode (c): oxidation at applied potential (0.1 V) for 7 min.

### Current-time curves for HER at various poly1-MoS<sub>x</sub> modified carbon foam electrodes

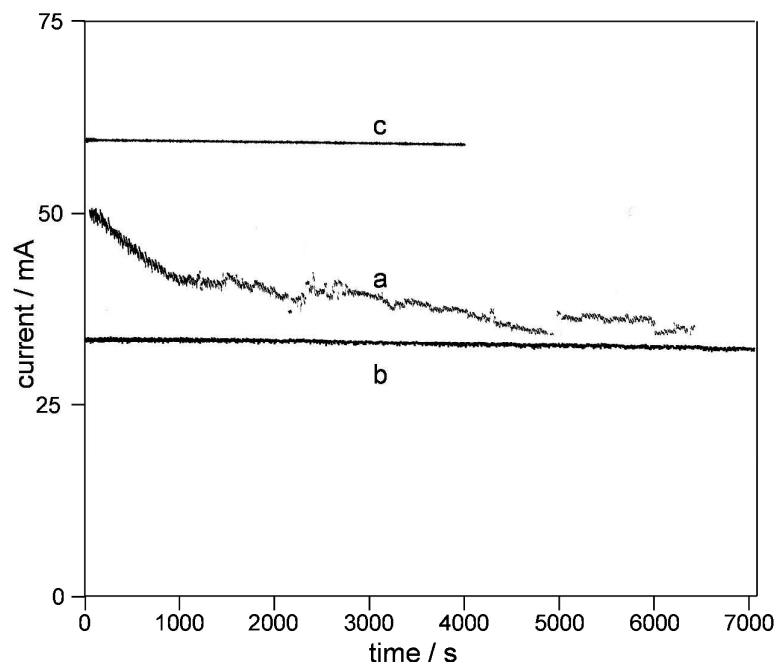

**Figure S5.** Current-time curves for protons reduction and HER at  $-0.3$  V vs. RHE, using poly1-MoS<sub>x</sub> modified carbon foam ( $0.8\text{ cm}^3$ ) electrodes modified with different poly1-MoS<sub>x</sub> materials (see Table 2); in every case the charge passed was 250 C. Curve a (corresponding to Entry 2 in Table 2): C|poly1 electrode soaked in 2 mM  $(\text{Et}_4\text{N})_2\text{MoS}_4$  in  $\text{CH}_3\text{CN}$ , then repetitively cycled in 0.1 M  $\text{NaClO}_4$ , pH 6 ( $8\text{ }\mu\text{mol}$  of poly1 +  $5.4\text{ }\mu\text{mol}$  of MoS<sub>x</sub>). Curve b (corresponding to Entry 3 in Table 2): C|poly1 electrode soaked in 10 mM aqueous  $(\text{NH}_4)_2\text{MoS}_4$ , then repetitively cycled in 0.1 M  $\text{NaClO}_4$ , pH 6 ( $5.5\text{ }\mu\text{mol}$  of poly1 +  $3.3\text{ }\mu\text{mol}$  of MoS<sub>x</sub>). Curve c (corresponding to Entry 4 in Table 2): C|poly1-MoS<sub>x</sub> electrode prepared in the same conditions as electrode for curve b ( $9.4\text{ }\mu\text{mol}$  of poly1 +  $5.6\text{ }\mu\text{mol}$  of MoS<sub>x</sub>).
